# Supplementary material
Source: HighWire-hosted journal article supplement (https://www.cmajopen.ca/highwire/filestream/81053/field_highwire_adjunct_files/1/original_submission.pdf)
Supplement: original_submission.pdf [file original_submission.pdf]

**Abstract:**

Background: Consequences of impaired driving disproportionately affect youth. Increasing rates of driving after using marijuana are especially concerning. This study describes individual- and area-level predictors of risky driving and passenger behaviours among grades 9-12 students in Canada.

Methods: The 2014/2015 Canadian Student Tobacco, Alcohol and Drug Survey was administered to 24,650 students in provincially generalizable samples. Dichotomous outcomes included: ever and last-30-day driving after (a) drinking alcohol and (b) using marijuana; and ever and last-30-day reporting of being a passenger with a driver who had been (c) drinking or (d) using marijuana.

Results: 7% of grade 9-12 students reported ever driving after drinking and 7% reported driving after using marijuana. In total, 41% reported ever participating in any risky driving or passenger behaviour. Over one-third (35%) reported ever riding with a driver who had been drinking and 20% reported ever riding with a driver who had been using marijuana. Logistic regression models demonstrated that males had higher odds of risky driving behaviours relative to females, whereas females had higher odds of risky passenger behaviours relative to males. Students from rural schools had higher odds of drinking and driving, and of riding with a drinking driver relative to students from urban schools. There were also significant differences in risky driving and passenger behaviours by province.

Interpretation: A substantial number of Canadian youth report risky driving and passenger behaviours. Federal marijuana policy should aim to reduce the prevalence of alcohol and other drug-impaired driving. Additional provincial impaired driving prevention policies are needed.

WORD COUNT: 250

1  
2  
3  
4  
5  
6  
7  
8  
9  
10  
11  
12  
13  
14  
15  
16  
17  
18  
19  
20  
21  
22  
23  
24  
25  
26  
27  
28  
29  
30  
31  
32  
33  
34  
35  
36  
37  
38  
39  
40  
41  
42  
43  
44  
45  
46  
47  
48  
49  
50  
51  
52  
53  
54  
55  
56  
57  
58  
59  
60

**Introduction:**

Accidents are the leading cause of death among Canadian 1-24 year olds, responsible for 35% of deaths among this age group.<sup>1-3</sup> Despite significant declines over the past three decades, traffic collisions comprise a bulk of accident-related mortality and injury, and place a significant burden on the health care system through emergency medical services, rehabilitation, and chronic care.<sup>4</sup> Young drivers are at higher risk of being killed in motor vehicle collisions than any other age group,<sup>5</sup> and 39% of car-crash deaths among 16-19 year olds were related to alcohol use in 2012.<sup>6</sup> Alcohol is the most commonly-used intoxicant in Canada,<sup>7</sup> and the link between alcohol-impaired driving and high accident involvement rates has been demonstrated consistently over time.<sup>8,9</sup>

Programs and policies to reduce the prevalence of alcohol-impaired driving have been established.<sup>10,11</sup> Less-frequently studied is adolescents' decisions to ride as passengers with impaired drivers. Using data from the 2008 Canadian Alcohol and Drug Use Monitoring Survey (CADUMS), one study found that 15% of 15-17 year olds reported riding with a driver under the influence of alcohol and 19% reported riding with a driver under the influence of cannabis.<sup>12</sup> Another, using 2009/2010 data from the Health Behaviour in School-Aged Children (HBSC) survey found that about 20% of grades 6-10 students reported riding with a driver who had consumed alcohol, cannabis or other illicit drugs in the past 30 days.<sup>13</sup> Younger age (9-15), male gender, heavy drinking, lower socio-economic status (SES), and rural residence are associated with riding with an impaired driver.<sup>12-15</sup>

Effects of cannabis consumption on driving is less frequently studied than the effect of alcohol consumption on driving. Cannabis is second only to alcohol as the most commonly used intoxicant in Canada.<sup>7</sup> Among Canadian youth, 19% reported cannabis use.<sup>16</sup> Cannabis-impaired driving has recently come to the fore given the Canadian government's plan to legalize the possession and sale of marijuana to adults. Proposed legislation to reduce drug-impaired driving was tabled in October 2016 in the Canadian senate,<sup>17</sup> and in the absence of current federal law, Canadian provinces have begun to

introduce new legislation to enact broader measures to address drug-impaired driving and to create heavier sanctions.<sup>18</sup>

Cannabis use compromises reaction time, concentration, visual acuity, short-term memory, and one's ability to handle unexpected events, but debate within the scientific community exists regarding the extent to which driving under the influence of cannabis causes motor vehicle fatalities.<sup>19-23</sup> It is generally accepted that driving under the influence of cannabis doubles drivers' risk of collision,<sup>21</sup> which is important given that almost twice as many Ontario students report driving after consuming cannabis than after consuming alcohol.<sup>24</sup> In Ontario in 2015, 12% of grades 7-12 students rode with a driver who had been using drugs at least once in the past year.<sup>24</sup>

In light of the impending legalization of cannabis in Canada and related concerns about safe driving and passenger practices, particularly among youth, this study describes individual- and area-level predictors of risky driving and passenger behaviours among grades 9-12 students in Canada. We also report inter-provincial differences, since driving age and alcohol policies vary by province. Forthcoming drug-impaired driving policies may also vary by province.

## **Methods:**

### **Study design**

The Canadian Student Tobacco, Alcohol and Drugs Survey (CSTADS) is a biennial, provincially-generalizable, paper-and-pencil, school-based survey administered to students across Canada (see <https://uwaterloo.ca/canadian-student-tobacco-alcohol-drugs-survey/>). The target population for 2014/2015 CSTADS was grades 6-12 students (6 to secondary V in the province of Quebec) attending private, public, and Catholic schools in all 10 provinces. The 2014/2015 CSTADS did not include a generalizable sample of students in the province of New Brunswick due to a low response rate. National estimates, however, do include data from the three New Brunswick schools that participated. The

1  
2  
3  
4  
5  
6  
7  
8  
9  
10  
11  
12  
13  
14  
15  
16  
17  
18  
19  
20  
21  
22  
23  
24  
25  
26  
27  
28  
29  
30  
31  
32  
33  
34  
35  
36  
37  
38  
39  
40  
41  
42  
43  
44  
45  
46  
47  
48  
49  
50  
51  
52  
53  
54  
55  
56  
57  
58  
59  
60

69 survey design was a stratified single stage cluster design; strata were based on health region smoking  
70 rate and type of school. In each province, two or three health region smoking rate strata and two  
71 school-level strata (elementary and high school) were defined. Schools were randomly selected within  
72 each stratum to ensure a generalizable sample within a province.

73 A total of 177 school boards (68% recruitment rate), 336 schools (47% recruitment rate), and  
74 42,094 students (66% recruitment rate) participated in the CSTADS (24,650 were in Grades 9-12);  
75 sample size was based on the ability of the sample to provide generalizable estimates at the provincial  
76 level. This study uses data from grades 9-12 students since the overwhelming majority of students in  
77 grades 7-8 are not old enough to operate motor vehicles in any province. Data were collected between  
78 October 2014 and May 2015.

79 The study received ethics approval from the Health Canada Research Ethics Board, the Office of  
80 Research Ethics at the University of Waterloo, and from ethics review boards located at institutions and  
81 school boards in each province.

82 **Measures**

83 Dichotomous outcomes from the 2014/2015 CSTADS include: ever and last-30-day experiences of 1)  
84 driving within 1 hour of drinking alcohol; 2) driving within 2 hours of using marijuana; 3) being a  
85 passenger in a vehicle driven by someone who consumed alcohol within the last hour; and 4) being a  
86 passenger in a vehicle driven by someone who had used marijuana in the last 2 hours. The first two  
87 outcomes were derived from survey responses to the question, “Have you driven a vehicle (e.g., car,  
88 snowmobile, motor boat, or all-terrain vehicle (ATV))...” a) within an hour of drinking one or more drinks  
89 of alcohol? and b) within 2 hours of using marijuana? Response options included “No, never”, “Yes, in  
90 the last 30 days”, “Yes, more than 30 days ago”. Outcomes three and four were derived from survey  
91 responses to the question, “Have you ever been a passenger in a vehicle (e.g., car, snowmobile, motor

boat, or all-terrain vehicle (ATV))..." a) driven by someone who had one or more drinks of alcohol in the last hour? and b) driven by someone who had been using marijuana in the last 2 hours?, with the same response options as above. For all four outcomes of interest, dichotomous variables were created to assess "Ever" (those who responded with either of the "yes" options) and "Last 30 day" (those who responded "Yes, in the last 30 days") driving and passenger behaviours.

Independent variables included respondents': sex (female, male); grade (9-12) (ages 13-17 in Canada); province of residence (with Ontario as the reference province given that it is the most populous province in Canada); binge drinking among students who reported consuming alcohol (never drinkers, students who reported ever drinking but never binge-drinking, and binge-drinkers: students who reported ever drinking at least five drinks on one occasion); and race/ethnicity (White, Black, Asian, Aboriginal, Latin American, or "other").

Two area-level independent variables were also examined: school-region socio-economic status (SES) and rural vs. urban school location. Median family income of the school's forward sortation area (first three digits of the postal code) from the 2011 census was dichotomized at the national median and treated as a dichotomous variable (High SES and Low SES). Urban and rural categories were based on Statistics Canada's Statistical Area Classification system and derived from school postal codes. Urban areas were considered census metropolitan areas (CMA) or census agglomerations (CA), which are areas consisting of at least one neighbouring municipality situated around a core. CMAs have a total population of at least 100,000 of which 50,000 must live in the core; CAs must have a core population of at least 10,000.<sup>25</sup> Rural areas were considered non- census metropolitan areas or census agglomerations. These definitions of SES and urban vs. rural locale were adopted since these are the variables contained in the CSTADS public use microdata file.<sup>26</sup>

1  
2  
3  
4  
5  
6  
7  
8  
9  
10  
11  
12  
13  
14  
15  
16  
17  
18  
19  
20  
21  
22  
23  
24  
25  
26  
27  
28  
29  
30  
31  
32  
33  
34  
35  
36  
37  
38  
39  
40  
41  
42  
43  
44  
45  
46  
47  
48  
49  
50  
51  
52  
53  
54  
55  
56  
57  
58  
59  
60

**Statistical Analysis**

Survey weights were used to adjust for sampling methods, non-response (school, class, and student levels), and calibration of the sample to the grade and sex distribution of the target population. Bootstrap weights were used for all analyses to account for survey design in the variances.

Descriptive statistics were used to show weighted prevalence of driving and passenger outcomes of interest according to the independent variables listed above. Logistic regression models were created to examine independent variables associated with ever and last-30-day: 1) driving after drinking; 2) driving after using marijuana; 3) riding with a driver who drank, and; 4) riding with a driver used marijuana. Covariates for each model included respondents' sex, grade, ethnicity, drinking behaviours, school-level SES, and school-level urban vs. rural locale. Logistic regression analyses were conducted using PROC SURVEYLOGISTIC in SAS 9.4 (SAS Institute Inc, Cary, North Carolina).

**Results:**

Table 1 presents sample characteristics. Overall, 7.1% of Canadian grades 9-12 students reported ever driving within an hour of drinking at least one drink (see Table 2). A similar proportion (6.6%) reported ever driving within two hours of using marijuana (see Table 3). A much greater proportion reported being passengers of drinking drivers (34.6%) (see Table 4) or marijuana-using drivers (19.8%) (see Table 5). Ever driving after drinking ranged from a low of 5.0% in Ontario to a high of 14.1% in Saskatchewan. Ever driving after using marijuana ranged from a low of 5.0% in Quebec and Ontario to 14.0% in Saskatchewan. In the overall sample, 41.2% (representing 622,300 grades 9-12 students) reported ever engaging in any risky driving or passenger behaviours: 24.7% (representing 372,300 grades 9-12 students) reported engaging in one behaviour and 16.6% (representing 250,000) reported engaging in more than one behaviour.

Females had lower odds than males of ever driving after drinking and of doing so in the last 30 days. Conversely, compared to males, females had higher odds of riding with a driver who had drank at least one alcoholic beverage in the hour before.

Grade 12 students had higher odds of reporting risky driving and passenger behaviours than grade 9 students (see Tables 2-5). Drinking and driving did not vary by ethnicity. Relative to those identifying as white, students identifying as Aboriginal had higher odds of driving after marijuana use and of being a passenger of a marijuana-using driver. Students identifying as Black had higher odds of last-30-day driving after using marijuana and students identifying as Latin American had higher odds of ever driving after using marijuana relative to students identifying as White. In contrast, compared to those identifying as white, students who identified as Asian had lower odds of riding as passengers of a marijuana-using driver. Students who reported binge drinking had higher odds of drinking and driving compared to students who reported never drinking.

Few differences by school region SES were observed, with the exception that students from high SES schools had lower odds of reporting riding with a drinking driver. Relative to urban students, students from rural schools had higher odds of reporting driving after drinking and of reporting riding with a drinking driver.

#### **Interpretation:**

In Canada in 2014/2015, 7% of grades 9-12 students reported ever driving within an hour of drinking alcohol or within 2 hours of using marijuana. A full 41%, representing 798,200 grades 9-12 students in Canada, reported ever engaging in at least one risky driving or passenger behaviour. We found significant differences in unsafe driving and passenger behaviours by individual characteristics such as gender, grade, and binge drinking behaviours. Few differences in unsafe driving or passenger

1  
2  
3  
4  
5  
6  
7  
8  
9  
10  
11  
12  
13  
14  
15  
16  
17  
18  
19  
20  
21  
22  
23  
24  
25  
26  
27  
28  
29  
30  
31  
32  
33  
34  
35  
36  
37  
38  
39  
40  
41  
42  
43  
44  
45  
46  
47  
48  
49  
50  
51  
52  
53  
54  
55  
56  
57  
58  
59  
60

behaviours existed by area-level factors such as school-level SES and urban vs. rural locale. Main findings are described in more detail below.

First, in our study, 10% of students reported ever driving after using alcohol or marijuana. Just over one-third (35%) of students reported being passengers of a drinking driver, and 20% reported being passengers of a marijuana-using driver. HBSC data from 2010 found 10% of Canadian 11-15 year olds reported drinking and driving off-road or on-road vehicles in the last 30 days.<sup>13</sup> In 2015, 5% of Ontario grades 10-12 students with a driver's licence reported driving after drinking and 10% reported driving after cannabis use.<sup>24</sup> In terms of passenger behaviours, 2008 CADUMS data showed that 14.6% of 15-17 year olds rode as a passenger of a drinking driver and 19.3% rode as a passenger of a marijuana-using driver,<sup>12</sup> while 2010 HSBC data showed that 21% of 11-15 year olds reported riding with a driver who had been using alcohol, marijuana or other illegal drugs in the last 30 days.<sup>13</sup> In 2015 in Ontario, 15% of grades 7-12 students rode with a drinking driver whereas 12% rode with a drug-using driver in the past year.<sup>24</sup> These differences are likely a function of survey methods, populations (e.g., the Ontario study examined driving behaviours among grades 10-12 students with a drivers' licence whereas we examined the entire sample of grades 9-12 students in Canada), or instruments (e.g., the CADUMS survey asked about past 12 month behaviour while CSTADS asked about "last 30 day" and "ever" behaviour).

Second, we found that while boys had higher odds of *driving* after drinking or using marijuana, girls had higher odds of *riding* with drivers who had been drinking or using marijuana. Males typically have higher odds of driving while impaired.<sup>27-29</sup> Findings around the gendered nature of risky *passenger* behaviours are inconsistent, with some studies finding males more likely to be passengers of impaired drivers,<sup>12,28,29</sup> others finding females at higher risk,<sup>30</sup> and still others finding no difference.<sup>27</sup> Consistent with past research, we found that older adolescents<sup>28-30</sup> and those who reported binge drinking<sup>12,27,30</sup> had higher odds of driving after drinking and riding with potentially impaired drivers.



1  
2  
3 183 We found few differences by school-region SES, but compared to urban students, rural students  
4  
5 184 had higher odds of reporting both driving after drinking and being a passenger in a vehicle with a driver  
6  
7  
8 185 who had been drinking, consistent with previous research.<sup>28-30</sup> Importantly, this was the first study to  
9  
10 186 find inter-provincial differences in risky driving and passenger behaviours. While there were few  
11  
12 187 significant differences in driving and passenger behaviours after alcohol consumption, students from the  
13  
14 188 three East Coast provinces for which provincially generalizable data were available (NL, PEI, and NS) had  
15  
16 189 significantly higher odds of driving and being a passenger after marijuana consumption relative to  
17  
18 190 Ontario students. This is important because irrespective of the forthcoming federal approach to  
19  
20 191 legalizing and regulating cannabis, it is within provincial jurisdiction to enact stricter provincial policies  
21  
22 192 to reduce cannabis-impaired driving.  
23  
24  
25  
26

27 193 The current study is subject to several limitations. First, survey items asked about driving within  
28  
29 194 an hour of consuming one or more drinks of alcohol or within two hours of using marijuana. While  
30  
31 195 cognitive interviewing showed these questions were easy to answer for the target population, they do  
32  
33 196 not assess level of impairment, which depend on driver characteristics and on the amount of alcohol or  
34  
35 197 marijuana consumed. Second, CSTADS did not include participants from Canada's territories where the  
36  
37 198 prevalence of impaired driving is high.<sup>31</sup> However, non-included populations represent only a small  
38  
39 199 fraction of the Canadian population. Third, given that CSTADS is focused on tobacco, alcohol and drug  
40  
41 200 use and not driving behaviours per se, we were unable to account for whether students had driver's  
42  
43 201 licences.<sup>30</sup> Our prevalence estimates of risky driving behaviours would likely have been higher had we  
44  
45 202 examined driving behaviours among licenced youth. Fourth, data presented here represent self-  
46  
47 203 reported responses. While efforts are made each cycle to establish the validity and reliability of  
48  
49 204 questionnaire items,<sup>32</sup> some under-reporting is likely. For example, youth might be more willing to admit  
50  
51 205 to being a passenger of a substance-using driver than they would be willing to admit they broke the law  
52  
53 206 by using a substance before driving. Distinguishing between alcohol use and marijuana use before  
54  
55  
56  
57  
58  
59  
60

1  
2  
3  
4  
5  
6  
7  
8  
9  
10  
11  
12  
13  
14  
15  
16  
17  
18  
19  
20  
21  
22  
23  
24  
25  
26  
27  
28  
29  
30  
31  
32  
33  
34  
35  
36  
37  
38  
39  
40  
41  
42  
43  
44  
45  
46  
47  
48  
49  
50  
51  
52  
53  
54  
55  
56  
57  
58  
59  
60

207 driving is a strength of the current study, particularly in light of impending marijuana legalization in  
208 Canada. In addition, the comprehensive measures we used included risky driving of all types. The  
209 national scope of the data and provincially-generalizable estimates are also study strengths.

210 Driving under the influence remains a problem in Canada. Impending legalization of marijuana  
211 requires further interventions to reduce impaired driving.<sup>33-35</sup> Innovative provincial policies can be  
212 implemented in the absence of federal legislation to reduce impaired driving.

213  
214

Confidential

## References

1. Transport Canada. Canadian motor vehicle traffic collision statistics.  
[https://www.tc.gc.ca/media/documents/roadsafety/cmvtcs2014\\_eng.pdf](https://www.tc.gc.ca/media/documents/roadsafety/cmvtcs2014_eng.pdf). Updated 2014. Accessed 08/30, 2016.
2. Perreault S. Impaired driving in canada, 2011. <http://www.statcan.gc.ca/pub/85-002-x/2013001/article/11739-eng.htm>. Updated 2015. Accessed 08/30, 2016.
3. Statistics Canada. Percentage distribution for the 5 leading causes of death in canada, 2011. <http://www.statcan.gc.ca/pub/82-625-x/2014001/article/11896/c-g/c-g01-eng.htm>. Updated 2015. Accessed 04/22, 2016.
4. Ramage-Morin PL. Motor vehicle accident deaths 1979-2004. *Statistics Canada Health Reports*. 2008;19(3).
5. Transport Canada. Road safety in canada. <http://www.tc.gc.ca/eng/motorvehiclesafety/tp-tp15145-1201.htm#s34>. Updated 2014. Accessed 08/30, 2016.
6. Traffic Injury Research Foundation of Canada. Alcohol and drug-crash problem in Canada 2012 report. . 2015;978 -1-927993- 17-0.
7. Adlaf EM, Patricia B, Sawka E. Canadian addiction survey (CAS): A national survey of Canadians' use of alcohol and other drugs, prevalence of use and related harms. detailed report. 2005.
8. Mann RE, Stoduto G, Vingilis E, et al. Alcohol and driving factors in collision risk. *Accid Anal Prev*. 2010;42(6):1538-1544.

1  
2  
3  
4  
5  
6  
7  
8  
9  
10  
11  
12  
13  
14  
15  
16  
17  
18  
19  
20  
21  
22  
23  
24  
25  
26  
27  
28  
29  
30  
31  
32  
33  
34  
35  
36  
37  
38  
39  
40  
41  
42  
43  
44  
45  
46  
47  
48  
49  
50  
51  
52  
53  
54  
55  
56  
57  
58  
59  
60

234 9. Williams AF. Alcohol-impaired driving and its consequences in the united states: The past 25 years. *J*  
235 *Saf Res.* 2006;37(2):123-138.

236 10. Zhao J, Stockwell T, Martin G, et al. The relationship between minimum alcohol prices, outlet  
237 densities and alcohol-attributable deaths in british columbia, 2002-09. *Addiction.* 2013;108(6):1059-  
238 1069.

239 11. Shults RA, Elder RW, Sleet DA, et al. Reviews of evidence regarding interventions to reduce alcohol-  
240 impaired driving. *Am J Prev Med.* 2001;21(4 SUPPL. 1):66-88.

241 12. Cartwright J, Asbridge M. Passengers' decisions to ride with a driver under the influence of either  
242 alcohol or cannabis. *J Stud Alcohol Drugs.* 2011;72(1):86-95.

243 13. Pickett W, Davison C, Torunian M, McFaull S, Walsh P, Thompson W. Drinking, substance use and the  
244 operation of motor vehicles by young adolescents in canada. *PLoS ONE.* 2012;7(8).

245 14. Beirness DJ. The characteristics of youth passengers of impaired drivers. . 2014.

246 15. Leadbeater BJ, Foran K, Grove-White A. How much can you drink before driving? the influence of  
247 riding with impaired adults and peers on the driving behaviors of urban and rural youth. *Addiction.*  
248 2008;103(4):629-637.

249 16. Government of Canada. Summary of results of the youth smoking survey 2012-2013: Marijuana and  
250 “Synthetic marijuana” use. [http://healthycanadians.gc.ca/publications/healthy-living-vie-saine/youth-](http://healthycanadians.gc.ca/publications/healthy-living-vie-saine/youth-smoking-survey-2013-enquete-jeunes-tabagisme/index-eng.php)  
251 [smoking-survey-2013-enquete-jeunes-tabagisme/index-eng.php](http://healthycanadians.gc.ca/publications/healthy-living-vie-saine/youth-smoking-survey-2013-enquete-jeunes-tabagisme/index-eng.php). Updated 2014. Accessed 09/09, 2016.

17. Harris K. Senator claudine carignan to table bill aimed at getting drug-impaired drivers off roads.  
<http://www.cbc.ca/news/politics/carignan-legislation-marijuana-impaired-driving-1.3786651>. Updated 2016. Accessed 10/04, 2016.
18. The Canadian Press. Ontario introduces fines, licence suspensions for drug-impaired driving. *The Globe and Mail*. September 28, 2016 2016. Available from:  
<http://www.theglobeandmail.com/news/national/ontario-introduces-fines-licence-suspensions-for-drug-impaired-driving/article32104976/>.
19. Asbridge M, Hayden JA, Cartwright JL. Acute cannabis consumption and motor vehicle collision risk: Systematic review of observational studies and meta-analysis. *BMJ (Online)*. 2012;344(7846).
20. Mura P, Kintz P, Ludes B, et al. Comparison of the prevalence of alcohol, cannabis and other drugs between 900 injured drivers and 900 control subjects: Results of a french collaborative study. *Forensic Sci Int*. 2003;133(1-2):79-85.
21. Laumon B, Gadegbeku B, Martin J-, Biecheler M-. Cannabis intoxication and fatal road crashes in france: Population based case-control study. *Br Med J*. 2005;331(7529):1371-1374.
22. Li M-, Brady JE, DiMaggio CJ, Lusardi AR, Tzong KY, Li G. Marijuana use and motor vehicle crashes. *Epidemiol Rev*. 2012;34(1):65-72.
23. Hartman RL, Huestis MA. Cannabis effects on driving skills. *Clin Chem*. 2013;59(3):478-492.
24. Boak A, Hamilton HA, Adlaf EM, Mann RE. Drug use among ontario students, 1977-2015: OSDUHS highlights (CAMH research document series no. 42). . 2015.

1  
2  
3  
4  
5  
6  
7  
8  
9  
10  
11  
12  
13  
14  
15  
16  
17  
18  
19  
20  
21  
22  
23  
24  
25  
26  
27  
28  
29  
30  
31  
32  
33  
34  
35  
36  
37  
38  
39  
40  
41  
42  
43  
44  
45  
46  
47  
48  
49  
50  
51  
52  
53  
54  
55  
56  
57  
58  
59  
60

25. Statistics Canada. Census metropolitan area (CMA) and census agglomeration (CA).  
<https://www12.statcan.gc.ca/census-recensement/2011/ref/dict/geo009-eng.cfm>. Updated 2015.

26. Rynard V, Cumming T, Burkhalter R, Manske S. 2014/2015 canadian student, Tobacco, alcohol and  
drugs survey microdata user guide  
.. 2015.

27. Li K, Simons-Morton BG, Hingson R. Impaired-driving prevalence among US high school students:  
Associations with substance use and risky driving behaviors. *Am J Public Health*. 2013;103(11):e71-e77.

28. Leadbeater BJ, Foran K, Grove-White A. How much can you drink before driving? the influence of  
riding with impaired adults and peers on the driving behaviors of urban and rural youth. *Addiction*.  
2008;103(4):629-637.

29. Pickett W, Davison C, Torunian M, McFaull S, Walsh P, Thompson W. Drinking, substance use and the  
operation of motor vehicles by young adolescents in canada. *PLoS ONE*. 2012;7(8).

30. Poulin C, Boudreau B, Asbridge M. Adolescent passengers of drunk drivers: A multi-level exploration  
into the inequities of risk and safety. *Addiction*. 2007;102(1):51-61.

31. Statistics Canada. Canadians who reported they have, at least once in the preceding 12 months,  
driven after having two drinks in the preceding hour, by age and sex, selected provinces and territories,  
2008 and 2010. <http://www.statcan.gc.ca/pub/85-002-x/2013001/article/11739/tbl/tbl04-eng.htm>.  
Updated 2015. Accessed 09/19, 2016.

32. Elton-Marshall T, Leatherdale ST, Manske SR, Wong K, Ahmed R, Burkhalter R. Research methods of  
the youth smoking survey (YSS). *Chronic Diseases and Injuries in Canada*. 2011;32(1):47-54.

- 1  
2  
3 291 33. Wanniarachige D. Drugged driving: Canada's laws lag behind. *Canadian Medical Association Journal*.  
4  
5 292 2015;187(8):E235-E236.  
6  
7  
8  
9 293 34. Kirst M, Kolar K, Chaiton M, et al. A common public health-oriented policy framework for cannabis,  
10  
11 294 alcohol and tobacco in canada? *Can J Public Health*. 2015;106(8):e474-e476.  
12  
13  
14  
15 295 35. Pacula RL, Kilmer B, Wagenaar AC, Chaloupka FJ, Caulkins JP. Developing public health regulations  
16  
17 296 for marijuana: Lessons from alcohol and tobacco. *Am J Public Health*. 2014;104(6):1021-1028.  
18  
19  
20  
21 297  
22  
23  
24  
25  
26  
27  
28  
29  
30  
31  
32  
33  
34  
35  
36  
37  
38  
39  
40  
41  
42  
43  
44  
45  
46  
47  
48  
49  
50  
51  
52  
53  
54  
55  
56  
57  
58  
59  
60

Confidential

1  
2  
3  
4  
5  
6  
7  
8  
9  
10  
11  
12  
13  
14  
15  
16  
17  
18  
19  
20  
21  
22  
23  
24  
25  
26  
27  
28  
29  
30  
31  
32  
33  
34  
35  
36  
37  
38  
39  
40  
41  
42  
43  
44  
45  
46  
47  
48  
49  
50  
51  
52  
53  
54  
55  
56  
57  
58  
59  
60

1     Table 1: Sample characteristics, grades 9-12 students: 2014/2015 CSTADS

|                    | Sample size (n) | Weighted % (99% CI) |
|--------------------|-----------------|---------------------|
| Canada (total)     | 24,650          |                     |
| Sex                |                 |                     |
| Female             | 12,514          | 48.6 (48.6, 48.6)   |
| Male               | 12,100          | 51.4 (51.4, 51.5)   |
| Grade              |                 |                     |
| 9                  | 7,200           | 25.2 (25.2, 25.2)   |
| 10                 | 6,986           | 25.3 (25.2, 25.3)   |
| 11                 | 6,193           | 25.5 (25.5, 25.5)   |
| 12                 | 4,271           | 24.0 (24.0, 24.1)   |
| Ethnicity          |                 |                     |
| White              | 16,970          | 60.9 (52.3, 69.4)   |
| Black              | 859             | 4.7 (3.0, 6.3)      |
| Asian              | 3,597           | 22.7 (14.6, 30.9)   |
| Latin American     | 434             | 2.3 (1.2, 3.3)      |
| Aboriginal         | 1,684           | 4.7 (3.0, 6.3)      |
| Other              | 955             | 4.8 (3.5, 6.0)      |
| Provinces          |                 |                     |
| NL                 | 2,458           | 1.4 (1.3, 1.4)      |
| PE                 | 1,446           | 0.5 (0.5, 0.5)      |
| NS                 | 2,778           | 2.7 (2.6, 2.7)      |
| QC                 | 2,608           | 15.9 (15.5, 16.3)   |
| ON                 | 3,657           | 46.3 (45.1, 47.6)   |
| MB                 | 1,863           | 4.0 (3.9, 4.1)      |
| SK                 | 1,895           | 3.2 (3.1, 3.3)      |
| AB                 | 3,957           | 10.8 (10.5, 11.1)   |
| BC                 | 3,862           | 12.9 (12.6, 13.3)   |
| School SES         |                 |                     |
| Low Median         | 12,066          | 44.9 (28.6, 61.1)   |
| High Median        | 12,584          | 55.1 (38.9, 71.4)   |
| Urban              |                 |                     |
| Yes                | 15,801          | 79.5 (68.1, 90.9)   |
| No                 | 8,849           | 20.5 (9.1, 31.9)*   |
| Ever Binge Drink   |                 |                     |
| Don't Drink        | 8,881           | 38.8 (34.4, 43.2)   |
| Drink but no binge | 4,052           | 18.1 (16.2, 20.1)   |
| Binge              | 10,955          | 43.1 (39.6, 46.5)   |

2

3



Table 2. Weighted prevalence and logistic regression analysis<sup>a</sup> of variables related to the odds of driving within an hour of drinking at least one drink among Canadian grades 9-12 students: 2014/2015 CSTADS

|                    | Last 30 days (n=22,861) | OR (99% CI)           | p value | Ever (n=22,861)  | OR (99% CI)            | p value |
|--------------------|-------------------------|-----------------------|---------|------------------|------------------------|---------|
| Canada (total)     | 2.7 (2.2-3.1)           |                       |         | 7.1 (6.3-8.0)    |                        |         |
| Sex                |                         |                       |         |                  |                        |         |
| Female             | 1.8 (1.4-2.2)           | 0.456 (0.290, 0.717)  | <0.0001 | 5.0 (4.0-6.0)    | 0.461 (0.333, 0.638)   | <0.0001 |
| Male               | 3.5 (2.8-4.2)           | Ref                   |         | 9.1 (7.8-10.4)   |                        |         |
| Grade              |                         |                       |         |                  |                        |         |
| 9                  | 1.6 (1.1-2.1)           | Ref                   |         | 4.2 (3.4-4.9)    | Ref                    |         |
| 10                 | 2.1 (1.5-2.6)           | 0.960 (0.461, 1.999)  | 0.8845  | 6.0 (4.8-7.1)    | 1.043 (0.714, 1.523)   | 0.7754  |
| 11                 | 2.9 (2.2-3.6)           | 1.235 (0.513, 2.971)  | 0.5343  | 7.1 (6.1-8.1)    | 1.138 (0.792, 1.635)   | 0.3562  |
| 12                 | 4.2 (3.2-5.1)           | 1.579 (0.774, 3.221)  | 0.0980  | 11.3 (9.2-13.4)  | 1.769 (1.185, 2.642)   | 0.0003  |
| Ethnicity          |                         |                       |         |                  |                        |         |
| White              | 2.9 (2.2-3.5)           | Ref                   |         | 8.2 (6.9-9.5)    | Ref                    |         |
| Black              | #                       | 2.070 (0.777, 5.516)  | 0.0555  | 5.7 (2.8-8.6)*   | 1.217 (0.618, 2.397)   | 0.4542  |
| Asian              | 1.1 (0.6-1.7)*          | 0.932 (0.443, 1.959)  | 0.8060  | 3.0 (2.1-3.9)    | 0.819 (0.471, 1.423)   | 0.3501  |
| Latin American     | #                       | 4.154 (0.676, 25.518) | 0.0430  | 11.5 (5.9-17.2)* | 2.336 (0.789, 6.915)   | 0.0438  |
| Aboriginal         | 5.2 (3.1-7.3)*          | 1.695 (0.696, 4.131)  | 0.1261  | 13.1 (9.2-17.1)  | 1.271 (0.666, 2.424)   | 0.3384  |
| Other              | 2.9 (1.1-4.7)*          | 1.956 (0.694, 5.513)  | 0.0946  | 6.1 (3.3-9.0)*   | 1.353 (0.526, 3.483)   | 0.4089  |
| Provinces          |                         |                       |         |                  |                        |         |
| NL                 | 4.0 (3.2-4.8)           | 1.548 (0.830, 2.888)  | 0.0705  | 10.7 (7.1-14.4)* | 1.737 (1.095, 2.755)   | 0.0021  |
| PE                 | 3.7 (2.8-4.5)           | 1.275 (0.673, 2.416)  | 0.3251  | 9.2 (7.0-11.5)   | 1.346 (0.831, 2.181)   | 0.1115  |
| NS                 | 3.1 (2.1-4.0)           | 1.036 (0.553, 1.942)  | 0.8848  | 7.3 (5.8-8.8)    | 1.099 (0.739, 1.635)   | 0.5394  |
| QC                 | 2.3 (1.1-3.6)*          | 0.783 (0.385, 1.594)  | 0.3747  | 7.0 (5.5-8.4)    | 1.017 (0.684, 1.512)   | 0.9125  |
| ON                 | 1.9 (1.3-2.5)           | Ref                   |         | 5.0 (3.7-6.4)    | Ref                    |         |
| MB                 | 2.6 (1.6-3.5)*          | 0.806 (0.362, 1.798)  | 0.4878  | 8.8 (5.0-12.5)*  | 1.297 (0.609, 2.762)   | 0.3736  |
| SK                 | 6.6 (3.3-10.0)*         | 2.639 (1.360, 5.122)  | 0.0002  | 14.1 (8.2-20.1)* | 2.436 (1.364, 4.349)   | <0.0001 |
| AB                 | 2.5 (1.8-3.2)           | 1.172 (0.643, 2.137)  | 0.4943  | 6.9 (5.4-8.4)    | 1.408 (0.950, 2.087)   | 0.0252  |
| BC                 | 3.3 (2.3-4.2)           | 1.326 (0.699, 2.518)  | 0.2552  | 9.0 (7.0-11.1)   | 1.653 (0.950, 2.875)   | 0.0193  |
| School SES         |                         |                       |         |                  |                        |         |
| Low Median         | 2.9 (2.2-3.5)           | Ref                   |         | 8.5 (6.8-10.2)   | Ref                    |         |
| High Median        | 2.5 (1.9-3.1)           | 1.214 (0.728, 2.024)  | 0.3283  | 6.0 (5.0-7.0)    | 0.899 (0.602, 1.344)   | 0.4944  |
| Urban              |                         |                       |         |                  |                        |         |
| Yes                | 2.0 (1.6-2.4)           | Ref                   |         | 5.4 (4.5-6.2)    | Ref                    |         |
| No                 | 5.4 (4.3-6.4)           | 2.058 (1.341, 3.160)  | <0.0001 | 13.6 (11.4-15.9) | 1.719 (1.287, 2.297)   | <0.0001 |
| Drinking behaviour |                         |                       |         |                  |                        |         |
| Don't Drink        | #                       | Ref                   |         | 0.9 (0.4-1.3)*   | Ref                    |         |
| Drink (no binge)   | 0.7 (0.4-1.0)*          | 1.446 (0.412, 5.076)  | 0.4477  | 2.4 (1.6-3.1)    | 2.569 (1.042, 6.333)   | 0.0071  |
| Binge drink        | 5.3 (4.5-6.2)           | 9.701 (3.026, 31.102) | <0.0001 | 14.2 (12.5-16.0) | 14.957 (6.068, 36.870) | <0.0001 |

<sup>a</sup> All logistic regressions were conducted using a complete case methods approach, so findings presented here are among all cases with complete data  
# high sampling variability/insufficient sample size – data suppressed.  
\* moderate sampling variability, interpret with caution.  
CSTADS Canadian Student Tobacco Alcohol and Drug Survey; *n* number; *OR* odds ratio; *CI* confidence interval

Confidential

Table 3: Logistic regression analysis<sup>a</sup> of variables related to the odds of driving within 2 hours of using marijuana among Canadian grades 9-12 students: 2014/2015 CSTADS

|                    | Last 30 days (n=22,614) | OR (99% CI)           | p value | Ever (n=22,614)    | OR (99% CI)          | p value |
|--------------------|-------------------------|-----------------------|---------|--------------------|----------------------|---------|
| Canada (total)     | 3.2 (2.7-3.7)           |                       |         | 6.6 (5.9-7.3)      |                      |         |
| Sex                |                         |                       |         |                    |                      |         |
| Female             | 2.2 (1.5-2.8)           | 0.455 (0.284, 0.729)  | <0.0001 | 5.0 (4.1-5.9)      | 0.513 (0.370, 0.710) | <0.0001 |
| Male               | 4.2 (3.5-4.9)           | Ref                   |         | 8.1 (7.1-9.1)      | Ref                  |         |
| Grade              |                         |                       |         |                    |                      |         |
| 9                  | 1.3 (0.8–1.8)*          | Ref                   |         | 3.0 (1.7 – 4.3)*   | Ref                  |         |
| 10                 | 2.0 (1.5–2.6)           | 1.477 (0.760, 2.874)  | 0.1299  | 4.5 (3.5 – 5.4)    | 1.148 (0.682, 1.934) | 0.4929  |
| 11                 | 3.6 (2.8–4.3)           | 2.089 (1.003, 4.350)  | 0.0097  | 7.3 (6.1-8.4)      | 1.582 (0.876, 2.859) | 0.0455  |
| 12                 | 6.0 (4.5–7.4)           | 2.940 (1.486, 5.819)  | <0.0001 | 11.8 (10.0 – 13.7) | 2.469 (1.468, 4.151) | <0.0001 |
| Ethnicity          |                         |                       |         |                    |                      |         |
| White              | 3.1 (2.5-3.6)           | Ref                   |         | 6.9 (6.0-7.9)      | Ref                  |         |
| Black              | 4.3 (1.5-7.1)*          | 2.624 (1.031, 6.676)  | 0.0078  | 6.7 (3.3-10.2)*    | 1.728 (0.788, 3.787) | 0.0721  |
| Asian              | 1.6 (0.9-2.4)*          | 1.073 (0.576, 1.999)  | 0.7704  | 2.8 (2.0-3.5)      | 0.787 (0.464, 1.334) | 0.2407  |
| Latin American     | #                       | 4.945 (0.927, 26.385) | 0.0139  | #                  | 3.289 (1.104, 9.797) | 0.0050  |
| Aboriginal         | 10.3 (7.7-13.0)         | 3.116 (1.715, 5.659)  | <0.0001 | 19.0 (14.0-24.1)   | 2.596 (1.573, 4.282) | <0.0001 |
| Other              | 2.5 (0.9-4.2)*          | 1.436 (0.647, 3.188)  | 0.2407  | 6.2 (3.2-9.3)*     | 1.540 (0.742, 3.198) | 0.1272  |
| Provinces          |                         |                       |         |                    |                      |         |
| NL                 | 7.0 (5.5-8.4)           | 2.586 (1.505, 4.444)  | <0.0001 | 12.9 (11.0-14.8)   | 2.353 (1.607, 3.445) | <0.0001 |
| PE                 | 7.4 (6.2-8.5)           | 2.649 (1.458, 4.814)  | <0.0001 | 11.5 (9.9-13.0)    | 1.979 (1.370, 2.858) | <0.0001 |
| NS                 | 5.1 (4.4-5.8)           | 1.726 (1.039, 2.867)  | 0.0056  | 10.0 (8.6-11.5)    | 1.750 (1.281, 2.392) | <0.0001 |
| QC                 | 1.8 (0.9-2.8)*          | 0.535 (0.238, 1.203)  | 0.0466  | 5.0 (2.4-7.6)*     | 0.805 (0.393, 1.646) | 0.4327  |
| ON                 | 2.5 (1.7-3.3)           | Ref                   |         | 5.0 (4.2-5.9)      | Ref                  |         |
| MB                 | 4.7 (2.8-6.6)*          | 1.229 (0.582, 2.593)  | 0.4755  | 10.9 (6.4-15.4)*   | 1.686 (0.875, 3.249) | 0.0400  |
| SK                 | 6.9 (2.8-11.0)*         | 2.015 (0.980, 4.141)  | 0.0122  | 14.0 (5.4-22.6)*   | 2.273 (1.141, 4.528) | 0.0022  |
| AB                 | 2.4 (1.6-3.2)*          | 0.914 (0.459, 1.822)  | 0.7365  | 5.5 (4.4-6.6)      | 1.130 (0.711, 1.795) | 0.4948  |
| BC                 | 5.0 (3.6-6.4)           | 1.694 (0.764, 3.756)  | 0.0876  | 9.5 (6.9-12.1)     | 1.774 (0.944, 3.334) | 0.0192  |
| School SES         |                         |                       |         |                    |                      |         |
| Low Median         | 3.6 (2.6-4.7)           | Ref                   |         | 7.8 (6.1-9.5)      | Ref                  |         |
| High Median        | 2.8 (2.3-3.3)           | 0.999 (0.510, 1.956)  | 0.9968  | 5.6 (4.8-6.4)      | 0.949 (0.558, 1.615) | 0.7989  |
| Urban              |                         |                       |         |                    |                      |         |
| Yes                | 2.9 (2.4-3.4)           | Ref                   |         | 5.8 (4.9-6.7)      | Ref                  |         |
| No                 | 4.3 (2.7-5.9)*          | 1.026 (0.566, 1.860)  | 0.9112  | 9.6 (7.8-11.5)     | 1.104 (0.738, 1.653) | 0.5253  |
| Drinking behaviour |                         |                       |         |                    |                      |         |
| Don't Drink        | #                       | Ref                   |         | 0.8 (0.3-1.3)*     | Ref                  |         |
| Drink (no binge)   | 0.5 (0.3-0.6)*          | 1.001 (0.298, 3.365)  | 0.9978  | 1.3 (0.9-1.7)*     | 1.401 (0.588, 3.337) | 0.3158  |

1  
2  
3  
4  
5  
6  
7  
8  
9  
10  
11  
12  
13  
14  
15  
16  
17  
18  
19  
20  
21  
22  
23  
24  
25  
26  
27  
28  
29  
30  
31  
32  
33  
34  
35  
36  
37  
38  
39  
40  
41  
42  
43  
44  
45  
46  
47  
48  
49

|             |               |                        |         |                  |                        |         |
|-------------|---------------|------------------------|---------|------------------|------------------------|---------|
| Binge drink | 6.6 (5.7-7.6) | 13.365 (4.407, 40.525) | <0.0001 | 13.7 (12.3-15.2) | 16.252 (6.576, 40.164) | <0.0001 |
|-------------|---------------|------------------------|---------|------------------|------------------------|---------|

<sup>a</sup> All logistic regressions were conducted using a complete case methods approach, so findings presented here are among all cases with complete data  
# high sampling variability/insufficient sample size – data suppressed.  
\* moderate sampling variability, interpret with caution.  
CSTADS Canadian Student Tobacco Alcohol and Drug Survey; *n* number; *OR* odds ratio; *CI* confidence interval

Confidential

Table 4: Logistic regression analysis<sup>a</sup> of variables related to the odds of riding with a driver who had at least one drink within the last hour among Canadian grades 9-12 students: 2014/2015 CSTADS

|                    | Last 30 days<br>(n=22,828) | OR (99% CI)          | p value | Ever (n=22,828)  | OR (99% CI)          | p value |
|--------------------|----------------------------|----------------------|---------|------------------|----------------------|---------|
| Canada (total)     | 11.0 (10.2-11.9)           |                      |         | 34.6 (32.4-36.9) |                      |         |
| Sex                |                            |                      |         |                  |                      |         |
| Female             | 12.2 (10.9-13.6)           | 1.246 (1.000-1.553)  | 0.0100  | 38.2 (35.5-41.0) | 1.342 (1.160-1.552)  | <0.0001 |
| Male               | 9.9 (8.9-10.9)             | Ref                  |         | 31.2 (29.1-33.3) | Ref                  |         |
| Grade              |                            |                      |         |                  |                      |         |
| 9                  | 9.1 (7.6-10.6)             | Ref                  |         | 29.8 (27.1-32.5) | Ref                  |         |
| 10                 | 11.1 (9.9-12.2)            | 0.985 (0.719-1.350)  | 0.9015  | 34.5 (31.9-37.2) | 1.020 (0.857-1.215)  | 0.7668  |
| 11                 | 12.4 (11.1-13.7)           | 1.007 (0.746-1.359)  | 0.9526  | 36.9 (34.7-39.1) | 1.054 (0.881-1.262)  | 0.4475  |
| 12                 | 11.6 (9.7-13.5)            | 0.899 (0.664-1.216)  | 0.3613  | 37.3 (32.9-41.7) | 1.015 (0.814-1.264)  | 0.8640  |
| Ethnicity          |                            |                      |         |                  |                      |         |
| White              | 13.4 (12.2-14.6)           | Ref                  |         | 39.6 (36.8-42.5) | Ref                  |         |
| Black              | 7.9 (4.3-11.5)*            | 0.791 (0.417-1.500)  | 0.3439  | 24.4 (16.6-32.2) | 0.686 (0.438-1.075)  | 0.0307  |
| Asian              | 5.5 (4.6-6.5)              | 0.681 (0.494-0.940)  | 0.0021  | 22.4 (20.5-24.3) | 0.796 (0.631-1.005)  | 0.0115  |
| Latin American     | 7.7 (4.8-10.7)*            | 0.605 (0.345-1.060)  | 0.0209  | 39.7 (32.4-47.0) | 1.110 (0.697-1.768)  | 0.5614  |
| Aboriginal         | 12.4 (9.8-15.0)            | 0.856 (0.564-1.298)  | 0.3345  | 42.7 (37.6-47.8) | 1.005 (0.738-1.370)  | 0.9659  |
| Other              | 11.0 (8.1-13.9)            | 1.053 (0.660-1.679)  | 0.7762  | 30.1 (22.3-37.9) | 0.876 (0.569-1.350)  | 0.4301  |
| Provinces          |                            |                      |         |                  |                      |         |
| NL                 | 10.0 (8.3-11.7)            | 0.866 (0.682-1.101)  | 0.1225  | 31.4 (26.2-36.7) | 0.790 (0.580-1.075)  | 0.0481  |
| PE                 | 10.6 (9.0-12.2)            | 0.930 (0.634-1.366)  | 0.6266  | 34.8 (31.9-37.8) | 0.888 (0.643-1.225)  | 0.3384  |
| NS                 | 9.2 (7.8-10.7)             | 0.821 (0.621-1.086)  | 0.0684  | 30.6 (27.8-33.3) | 0.802 (0.591-1.088)  | 0.0622  |
| QC                 | 15.4 (12.4-18.5)           | 1.347 (0.912-1.990)  | 0.0486  | 43.8 (40.0-47.5) | 1.217 (0.868-1.705)  | 0.1336  |
| ON                 | 9.1 (7.8-10.3)             | Ref                  |         | 30.9 (26.7-35.1) | Ref                  |         |
| MB                 | 9.1 (7.0-11.1)             | 0.891 (0.582-1.365)  | 0.4848  | 30.5 (24.4-36.6) | 0.790 (0.521-1.197)  | 0.1426  |
| SK                 | 14.7 (11.3-18.1)           | 1.442 (1.040-1.998)  | 0.0039  | 38.7 (29.1-48.2) |                      | 0.6669  |
| AB                 | 9.9 (7.6-12.1)             | 1.193 (0.801-1.776)  | 0.2526  | 31.3 (28.7-33.8) | 1.005 (0.738-1.368)  | 0.9670  |
| BC                 | 11.4 (8.8-13.9)            | 1.230 (0.853-1.773)  | 0.1449  | 34.9 (28.7-41.1) | 1.052 (0.770-1.439)  | 0.6728  |
| School SES         |                            |                      |         |                  |                      |         |
| Low Median         | 12.2 (10.9-13.6)           | Ref                  |         | 40.0 (37.0-43.0) | Ref                  |         |
| High Median        | 10.1 (8.8-11.4)            | 0.989 (0.806-1.213)  | 0.8864  | 30.3 (27.1-33.4) | 0.787 (0.620-1.000)  | 0.0099  |
| Urban              |                            |                      |         |                  |                      |         |
| Yes                | 9.6 (8.6-10.7)             | Ref                  |         | 30.7 (28.3-33.3) | Ref                  |         |
| No                 | 16.4 (14.1-18.6)           | 1.117 (0.871-1.431)  | 0.2508  | 49.5 (46.2-52.8) | 1.403 (1.149-1.713)  | <0.0001 |
| Drinking behaviour |                            |                      |         |                  |                      |         |
| Don't Drink        | 3.6 (3.0-4.3)              | Ref                  |         | 17.2 (15.0-19.4) | Ref                  |         |
| Drink (no binge)   | 8.1 (6.8-9.5)              | 2.122 (1.390, 3.240) | <0.0001 | 32.9 (29.1-36.8) | 2.045 (1.578, 2.649) | <0.0001 |

1  
2  
3  
4  
5  
6  
7  
8  
9  
10  
11  
12  
13  
14  
15  
16  
17  
18  
19  
20  
21  
22  
23  
24  
25  
26  
27  
28  
29  
30  
31  
32  
33  
34  
35  
36  
37  
38  
39  
40  
41  
42  
43  
44  
45  
46  
47  
48  
49

|             |                  |                      |         |                  |                      |         |
|-------------|------------------|----------------------|---------|------------------|----------------------|---------|
| Binge drink | 18.5 (17.1-20.0) | 5.068 (3.470, 7.404) | <0.0001 | 49.8 (47.1-52.6) | 3.835 (3.082, 4.771) | <0.0001 |
|-------------|------------------|----------------------|---------|------------------|----------------------|---------|

<sup>a</sup> All logistic regressions were conducted using a complete case methods approach, so findings presented here are among all cases with complete data  
# high sampling variability/insufficient sample size – data suppressed.  
\* moderate sampling variability, interpret with caution.  
CSTADS Canadian Student Tobacco Alcohol and Drug Survey; *n* number; *OR* odds ratio; *CI* confidence interval

Confidential

Table 5: Logistic regression analysis<sup>a</sup> of variables related to the odds of riding with a driver who had marijuana within two hours of driving among Canadian grades 9-12 students: 2014/2015 CSTADS

|                    | Last 30 days<br>(n=22,648) | OR (99% CI)            | p value | Ever (n=22,648)   | OR (99% CI)            | p value |
|--------------------|----------------------------|------------------------|---------|-------------------|------------------------|---------|
| Canada (total)     | 9.0 (7.9-10.1)             |                        |         | 19.8 (18.0-21.6)  |                        |         |
| Sex                |                            |                        |         |                   |                        |         |
| Female             | 8.9 (7.7-10.2)             | 0.989 (0.633, 1.274)   | 0.4279  | 19.9 (18.0-21.8)  | 0.917 (0.715, 1.175)   | 0.3663  |
| Male               | 9.1 (7.6-10.7)             | Ref                    |         | 19.6 (17.4-21.8)  | Ref                    |         |
| Grade              |                            |                        |         |                   |                        |         |
| 9                  | 4.0 (2.9-5.0)              | Ref                    |         | 9.1 (6.9-11.3)    | Ref                    |         |
| 10                 | 6.4 (5.3-7.5)              | 1.330 (0.952, 1.858)   | 0.0277  | 15.5 (13.0-18.0)  | 1.352 (0.955, 1.915)   | 0.0252  |
| 11                 | 10.6 (9.2-11.9)            | 1.890 (1.209, 2.955)   | 0.0003  | 22.5 (20.5-24.4)  | 2.989 (1.316, 2.738)   | <0.0001 |
| 12                 | 15.4 (11.8-19.1)           | 2.560 (1.469, 4.459)   | <0.0001 | 32.4 (27.4-37.4)  | 2.941 (1.880, 4.602)   | <0.0001 |
| Ethnicity          |                            |                        |         |                   |                        |         |
| White              | 10.3 (8.6-11.9)            | Ref                    |         | 22.9 (20.0-25.8)  | Ref                    |         |
| Black              | 8.2 (4.4-12.1)*            | 1.260 (0.593, 2.678)   | 0.4281  | 17.0 (11.7-22.2)  | 1.076 (0.586, 1.972)   | 0.7564  |
| Asian              | 4.3 (3.1-5.5)              | 0.724 (0.494, 1.061)   | 0.0294  | 8.3 (7.0-9.5)     | 0.535 (0.335, 0.853)   | 0.0006  |
| Latin American     | 6.6 (3.5-9.8)*             | 0.826 (0.346, 1.972)   | 0.5699  | 23.9 (17.5-30.3)  | 1.399 (0.630, 3.105)   | 0.2770  |
| Aboriginal         | 20.1 (16.5-23.7)           | 2.095 (1.467, 2.993)   | <0.0001 | 38.8 (33.0-44.6)  | 1.942 (1.362, 2.770)   | <0.0001 |
| Other              | 7.3 (4.1-10.4)*            | 1.004 (0.450, 2.239)   | 0.9897  | 17.5 (11.6-23.5)* | 1.066 (0.524, 2.169)   | 0.8163  |
| Provinces          |                            |                        |         |                   |                        |         |
| NL                 | 15.9 (12.6-19.3)           | 1.936 (1.096, 3.418)   | 0.0028  | 31.3 (28.1-34.5)  | 1.929 (1.260, 2.955)   | <0.0001 |
| PE                 | 15.3 (13.6-17.1)           | 1.879 (1.210, 2.919)   | 0.0002  | 29.2 (26.9-31.6)  | 1.747 (1.194, 2.558)   | 0.0002  |
| NS                 | 13.8 (11.9-15.7)           | 1.628 (1.000, 2.651)   | 0.0100  | 27.8 (25.4-30.3)  | 1.719 (1.147, 2.578)   | 0.0006  |
| QC                 | 6.7 (4.5-9.0)*             | 0.826 (0.505, 1.353)   | 0.3182  | 17.9 (12.5-23.4)* | 0.932 (0.541, 1.608)   | 0.7397  |
| ON                 | 7.8 (5.7-9.8)              | Ref                    |         | 17.2 (14.2-20.1)  | Ref                    |         |
| MB                 | 10.0 (7.2-12.9)            | 1.006 (0.584, 1.734)   | 0.9778  | 22.5 (16.7-28.2)  | 1.128 (0.641, 1.985)   | 0.5821  |
| SK                 | 14.3 (8.6-20.0)*           | 1.478 (0.876, 2.494)   | 0.0543  | 27.1 (15.9-38.4)* | 1.332 (0.742, 2.389)   | 0.2054  |
| AB                 | 8.1 (6.6-9.6)              | 1.199 (0.758, 1.898)   | 0.3063  | 18.5 (16.9-20.1)  | 1.323 (0.942, 1.858)   | 0.0337  |
| BC                 | 12.8 (9.7-15.9)            | 1.792 (1.054, 3.048)   | 0.0047  | 24.9 (19.6-30.3)  | 1.692 (1.114, 2.570)   | 0.0012  |
| School SES         |                            |                        |         |                   |                        |         |
| Low Median         | 10.1 (8.0-12.2)            | Ref                    |         | 22.9 (19.2-26.6)  | Ref                    |         |
| High Median        | 8.2 (6.7-9.6)              | 1.035 (0.562, 1.908)   | 0.8836  | 17.2 (14.9-19.5)  | 0.944 (0.611, 1.458)   | 0.7323  |
| Urban              |                            |                        |         |                   |                        |         |
| Yes                | 8.5 (7.2-9.8)              | Ref                    |         | 18.2 (16.1-20.4)  | Ref                    |         |
| No                 | 11.1 (8.7-13.5)            | 0.853 (0.606, 1.201)   | 0.2300  | 25.5 (21.9-29.2)  | 0.899 (0.644, 1.254)   | 0.4081  |
| Drinking behaviour |                            |                        |         |                   |                        |         |
| Don't Drink        | 1.3 (0.9-1.7)*             | Ref                    |         | 3.4 (2.8-4.0)     | Ref                    |         |
| Drink (no binge)   | 3.2 (2.5-4.0)              | 2.184 (1.417, 3.365)   | <0.0001 | 9.4 (8.1-10.7)    | 2.462 (1.865, 3.250)   | <0.0001 |
| Binge drink        | 18.1 (16.1-20.1)           | 13.317 (8.135, 21.801) | <0.0001 | 37.5 (34.5-40.5)  | 12.901 (9.887, 16.834) | <0.0001 |

<sup>a</sup> All logistic regressions were conducted using a complete case methods approach, so findings presented here are among all cases with complete data  
# high sampling variability/insufficient sample size – data suppressed.  
\* moderate sampling variability, interpret with caution.  
CSTADS Canadian Student Tobacco Alcohol and Drug Survey; *n* number; *OR* odds ratio; *CI* confidence interval

Confidential



**Title:** Under the influence: A cross-sectional examination of prevalence and correlates of alcohol and marijuana consumption in relation to youth driving and passenger behaviours in Canada from 2014/2015 CSTADS

Running Head: Youth driving after alcohol and marijuana use

**Authors' names:**

Leia M. Minaker, PhD

Affiliation: 1) School of Planning, Faculty of Environment, University of Waterloo  
2) Propel Centre for Population Health Impact, University of Waterloo

Email: [lminaker@uwaterloo.ca](mailto:lminaker@uwaterloo.ca)

Aaron Bonham, MSc

Affiliation: 1) Propel Centre for Population Health Impact, University of Waterloo  
Email: [abonham@uwaterloo.ca](mailto:abonham@uwaterloo.ca)

Tara Elton Marshall, PhD

Affiliation: 1) Institute for Mental Health Policy Research, Centre for Addiction and Mental Health  
2) Dalla Lana School of Public Health, University of Toronto

Email: [tara.eltonmarshall@camh.ca](mailto:tara.eltonmarshall@camh.ca)

Cesar Leos-Toro, PhD (cand)

Affiliation: 1) School of Public Health & Health Systems, University of Waterloo

Email: [cesar.leos-toro@uwaterloo.ca](mailto:cesar.leos-toro@uwaterloo.ca)

T. Cameron Wild, PhD

Affiliation: 1) School of Public Health, University of Alberta.

Email: [cwild@ualberta.ca](mailto:cwild@ualberta.ca)

David Hammond, PhD

Affiliation: 1) School of Public Health & Health Systems, University of Waterloo

Email: [dhammond@uwaterloo.ca](mailto:dhammond@uwaterloo.ca)

**Funding Statement:** This manuscript was supported by the Canadian Cancer Society grant #2011-701019, through the Propel Centre for Population Health Impact. Data used for this research was taken from Health Canada's Canadian Student Tobacco, Alcohol and Drugs Survey (CSTADS; formerly Youth Smoking Survey), which was conducted for Health Canada by the Propel Centre for Population Health Impact at the University of Waterloo. Health Canada has not reviewed, approved, nor endorsed this research. Any views expressed or conclusions drawn herein do not necessarily represent those of Health Canada. LMM would additionally like to gratefully acknowledge a Career Development Award from the Canadian Cancer Society (award # 704744). Additional support was provided by a CIHR PHAC Chair in Applied Public Health (DH).

**Competing Interests:** None of the authors have any competing interests to declare.
